# Supplementary material for: Health-Promoting Properties of Processed Red Cabbage (Brassica oleracea var. capitata f. rubra): Effects of Drying Methods on Bio-Compound Retention
Source: MDPI journal article supplement (doi:10.3390/foods13060830), 2024-03-08
Supplement: s1 [file s1]

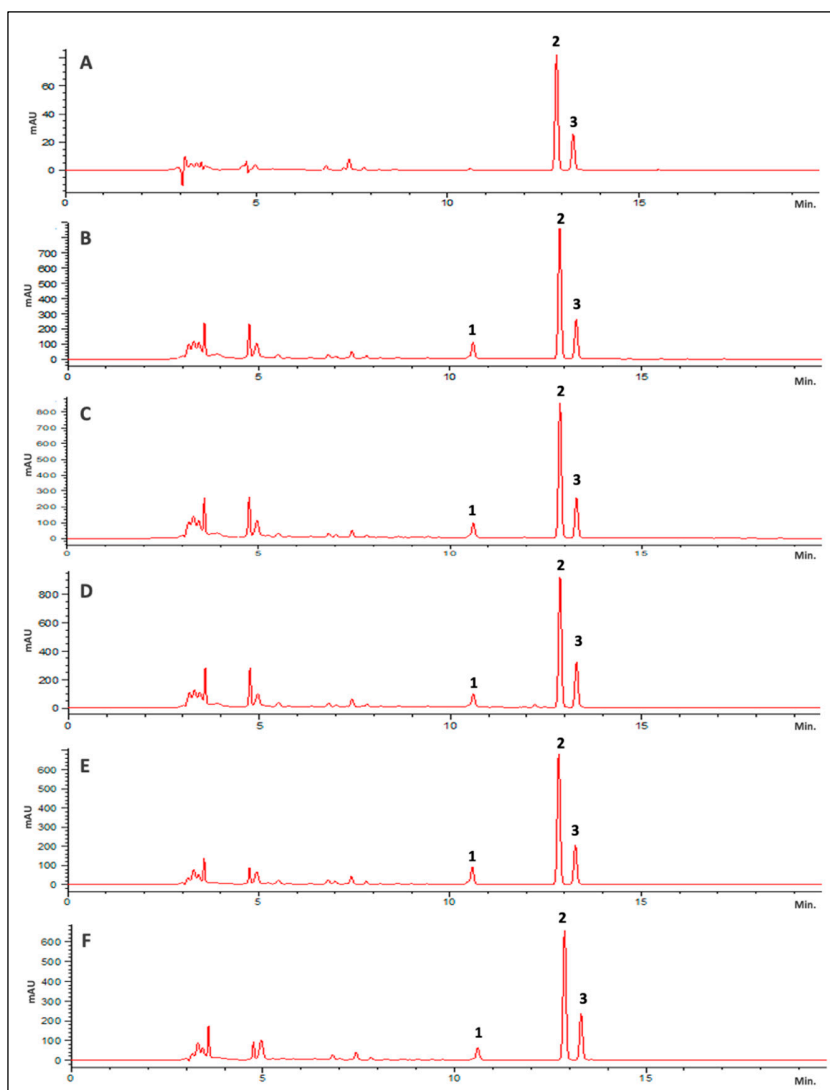

Supplementary figure: UV chromatogram (310 nm) of fresh-b and dried red cabbage by different drying methods. (A) *fresh-b*, (B) *hot air drying*, (C) *vacuum drying*, (D) *infrared drying*, (E) *low temperature vacuum drying*, and (F) *freeze-drying*. Peaks: (1) *Caffeic acid*, (2) *Ferulic acid*, (3) *Sinapic acid*.
